# Supplementary material for: Metabolic characterization of a CHO cell size increase phase in fed-batch cultures
Source: PubMed Central journal article supplement (PMC5656727; doi:10.1007/s00253-017-8531-y), 2017-09-26
Supplement: 253_2017_8531_MOESM1_ESM.pdf [file 253_2017_8531_MOESM1_ESM.pdf]

*Applied Microbiology and Biotechnology*

**Title**

Metabolic characterization of a CHO cell size increase phase in fed-batch cultures

**Authors**

Xiao Pan <sup>a</sup> (Corresponding author), Ciska Dalm <sup>b</sup>, René H. Wijffels <sup>a,c</sup>, Dirk E. Martens <sup>a</sup>

<sup>a</sup> Bioprocess Engineering, Wageningen University, PO Box 16, 6700 AA, Wageningen, the Netherlands

<sup>b</sup> Synthon Biopharmaceuticals BV, Upstream Process Development, PO Box 7071, 6503 GN, Nijmegen, the Netherlands

<sup>c</sup> Faculty of Biosciences and Aquaculture, Nord University, N-8049, Bodø, Norway

**Correspondence:** Xiao Pan;

E-mail address: [xiao.pan@wur.nl](mailto:xiao.pan@wur.nl)

Telephone: +31-317482683

# ESM\_1 Flux distribution and flux variability analysis

The metabolic model is based on an earlier published general model for mammalian cells (Martens and Tramper, 2009). Several modifications were made based on the Kyoto Encyclopedia of Genes and Genomes (KEGG) database, the iCHOv1 model, and the measurements done in this study:

1. To allow for production or uptake of the organic acids, acetic acid, fumaric acid, formic acid, citric acid, isovaleric acid, 2-oxobutanoic acid, pyruvic acid, and succinic acid transport steps over the membrane were included in the model. Furthermore, for isovaleric acid and 2-oxobutanoic acid pathways for threonine, serine and leucine degradation, which were lumped in the original model, were split based on KEGG pathways to allow for the synthesis of these compounds. Thioesterases were assumed to be responsible for the formation of acetic acid from acetyl-coA and isovaleric acid from isovaleric acid-CoA.
2. The fatty acid composition was measured and included in the lipid synthesis reaction.
3. The reaction for the monoclonal antibody product was modified to the known amino acid composition of IgG1.
4. The biomass equation was modified based on the biomass analysis for both the NI and the SI phases in this study and thus different biomass equations were used for these phases. The amount of biomass made in both equations corresponds to the mass of  $10^9$  cells from the NI phase.

## Flux balance analysis

| Abbreviation | Reaction                                                                                                                                         | NI Phase constrains |             | SI Phase constrains |             | Flux distribution |          |
|--------------|--------------------------------------------------------------------------------------------------------------------------------------------------|---------------------|-------------|---------------------|-------------|-------------------|----------|
|              |                                                                                                                                                  | Lower bound         | Upper bound | Lower bound         | Upper bound | NI Phase          | SI Phase |
| 2_7_1_1      | $\text{Glc}[c] + \text{ATP}[c] \rightleftharpoons \text{ADP}[c] + \text{H}[c] + \text{G6P}[c]$                                                   | 0                   | 10000       | 0                   | 10000       | 4.489             | 4.069    |
| L_PPP1       | $\text{G6P}[c] + \text{H}_2\text{O}[c] + 2 \text{NADP}[c] \rightleftharpoons 2 \text{H}[c] + \text{CO}_2[c] + \text{R5P}[c] + 2 \text{NADPH}[c]$ | 0                   | 10000       | 0                   | 10000       | 2.642             | 2.983    |
| L_R5P1       | $\text{R5P}[c] \rightleftharpoons \text{X5P}[c]$                                                                                                 | -10000              | 10000       | -10000              | 10000       | 1.666             | 1.932    |
| 2_2_1_1a     | $\text{R5P}[c] + \text{X5P}[c] \rightleftharpoons \text{S7P}[c] + \text{GAP}[c]$                                                                 | -10000              | 10000       | -10000              | 10000       | 0.833             | 0.966    |
| 2_2_1_2      | $\text{S7P}[c] + \text{GAP}[c] \rightleftharpoons \text{E4P}[c] + \text{F6P}[c]$                                                                 | -10000              | 10000       | -10000              | 10000       | 0.833             | 0.966    |

|           |                                                                        |        |       |        |       |        |        |
|-----------|------------------------------------------------------------------------|--------|-------|--------|-------|--------|--------|
| 2_2_1_1b  | X5P[c] + E4P[c] <=> GAP[c] + F6P[c]                                    | -10000 | 10000 | -10000 | 10000 | 0.833  | 0.966  |
| 5_3_1_9   | G6P[c] <=> F6P[c]                                                      | -10000 | 10000 | -10000 | 10000 | 1.707  | 0.956  |
| 2_7_1_11  | ATP[c] + F6P[c] <=> ADP[c] + H[c] + F16P[c]                            | 0      | 10000 | 0      | 10000 | 3.373  | 2.889  |
| 3_1_3_11  | H2O[c] + F16P[c] <=> F6P[c] + Pi[c]                                    | 0      | 10000 | 0      | 10000 | 0.000  | 0.000  |
| L_GLC1    | F16P[c] <=> 2 GAP[c]                                                   | -10000 | 10000 | -10000 | 10000 | 3.373  | 2.889  |
| L_GLC2    | ADP[c] + GAP[c] + Pi[c] + NAD[c] <=> ATP[c] + H[c] + 3PG[c] + NADH[c]  | 0      | 10000 | 0      | 10000 | 7.504  | 6.657  |
| L_GLC3    | 3PG[c] <=> H2O[c] + PEP[c]                                             | -10000 | 10000 | -10000 | 10000 | 7.567  | 6.657  |
| 2_7_1_40  | ADP[c] + H[c] + PEP[c] <=> ATP[c] + PYR[c]                             | 0      | 10000 | 0      | 10000 | 7.567  | 6.657  |
| 1_1_1_27  | H[c] + NADH[c] + PYR[c] <=> NAD[c] + LAC[c]                            | -10000 | 10000 | -10000 | 10000 | 3.103  | -0.201 |
| T_Pyr     | PYR[c] <=> PYR[m]                                                      | -10000 | 10000 | -10000 | 10000 | 1.961  | 4.902  |
| E012      | PYR[m] + CoA[m] + NAD[m] <=> CO2[c] + AcCoA[m] + NADH[m]               | 0      | 10000 | 0      | 10000 | 4.823  | 7.547  |
| 3_1_2_1   | H2O[c] + AcCoA[m] <=> H[c] + CoA[m] + ACE[m]                           | 0      | 10000 | 0      | 10000 | 0.051  | 0.216  |
| T_ACE     | ACE[m] <=> ACE[c]                                                      | -10000 | 10000 | -10000 | 10000 | 0.051  | 0.216  |
| 4_1_3_7   | H2O[c] + AcCoA[m] + OXA[m] <=> H[c] + CoA[m] + CIT[m]                  | 0      | 10000 | 0      | 10000 | 5.275  | 7.758  |
| L_TCA1    | NAD[m] + CIT[m] <=> CO2[c] + NADH[m] + AKG[m]                          | 0      | 10000 | 0      | 10000 | 3.230  | 5.394  |
| L_TCA2    | CoA[m] + NAD[m] + AKG[m] <=> CO2[c] + NADH[m] + SUCCoA[m]              | 0      | 10000 | 0      | 10000 | 2.715  | 5.059  |
| 6_2_1_4   | Pi[c] + SUCCoA[m] + GDP[c] <=> CoA[m] + SUC[m] + GTP[c]                | 0      | 10000 | 0      | 10000 | 2.695  | 5.102  |
| 1_3_99_1  | SUC[m] + FAD[m] <=> FADH2[m] + FUM[m]                                  | -10000 | 10000 | -10000 | 10000 | 3.451  | 5.499  |
| 4_2_1_2b  | H2O[c] + FUM[m] <=> MAL[m]                                             | -10000 | 10000 | -10000 | 10000 | 3.583  | 5.615  |
| 1_1_1_37b | NAD[m] + MAL[m] <=> H[c] + NADH[m] + OXA[m]                            | -10000 | 10000 | -10000 | 10000 | 2.697  | 3.824  |
| 6_4_1_1   | ATP[c] + CO2[c] + H2O[c] + PYR[m] <=> ADP[c] + 2 H[c] + Pi[c] + OXA[m] | 0      | 10000 | 0      | 10000 | 2.564  | 3.754  |
| 4_1_1_32a | CO2[c] + PEP[c] + GDP[c] <=> GTP[c] + OXA[c]                           | -10000 | 0     | -10000 | 0     | 0.000  | 0.000  |
| 1_1_1_40a | NADP[c] + MAL[c] <=> CO2[c] + NADPH[c] + PYR[c]                        | -10000 | 10000 | -10000 | 10000 | -1.681 | -1.913 |
| 1_1_1_40b | NAD[m] + MAL[m] <=> CO2[c] + PYR[m] + NADH[m]                          | -10000 | 10000 | -10000 | 10000 | 5.238  | 6.297  |
| T_SUC     | SUC[m] <=> SUC[c]                                                      | -10000 | 10000 | -10000 | 10000 | -0.490 | -0.166 |

|          |                                                                                                                                            |        |       |        |       |        |        |
|----------|--------------------------------------------------------------------------------------------------------------------------------------------|--------|-------|--------|-------|--------|--------|
| 2_6_1_2  | PYR[c] + GLU[c] <=> AKG[c] + ALA[c]                                                                                                        | -10000 | 10000 | -10000 | 10000 | 0.820  | 0.183  |
| 3_5_1_1  | H2O[c] + ASN[c] <=> NH4[c] + ASP[c]                                                                                                        | 0      | 10000 | 0      | 10000 | 0.849  | 0.395  |
| 3_5_1_2  | H2O[c] + GLN[c] <=> NH4[c] + GLU[m]                                                                                                        | 0      | 10000 | 0      | 10000 | 0.000  | 0.000  |
| 1_4_1_3a | H2O[c] + NAD[m] + GLU[m] <=> H[c] + NADH[m] + AKG[m] + NH4[c]                                                                              | -10000 | 10000 | -10000 | 10000 | -0.156 | 0.426  |
| L_PRO1   | H2O[c] + NAD[m] + PRO[c] <=> H[c] + NADH[m] + G5S[m]                                                                                       | -10000 | 10000 | -10000 | 10000 | 0.815  | 2.072  |
| L_G5S1   | H2O[c] + G5S[m] + NADP[m] <=> 2 H[c] + GLU[m] + NADPH[m]                                                                                   | -10000 | 10000 | -10000 | 10000 | 0.770  | 2.046  |
| L_CYS1   | AKG[m] + NADPH[m] + 2 O2[c] + CYS[c] <=> H[c] + PYR[m] + GLU[m] + NADP[m] + SO4[c]                                                         | 0      | 10000 | 0      | 10000 | 0.188  | 0.102  |
| L_GLYCLE | NAD[m] + GLY[c] + THF[c] <=> CO2[c] + NADH[m] + NH4[c] + METHF[c]                                                                          | -10000 | 10000 | -10000 | 10000 | -0.084 | -0.086 |
| 2_1_2_1a | H2O[c] + GLY[c] + METHF[c] <=> THF[c] + SER[c]                                                                                             | -10000 | 10000 | -10000 | 10000 | -0.411 | -0.257 |
| 4_3_1_17 | SER[c] <=> PYR[c] + NH4[c]                                                                                                                 | 0      | 10000 | 0      | 10000 | 0.000  | 0.142  |
| L_THR1   | CoA[m] + NAD[m] + THR[c] <=> H[c] + AcCoA[m] + NADH[m] + GLY[c]                                                                            | 0      | 10000 | 0      | 10000 | 0.027  | 0.020  |
| 4_3_1_19 | THR[c] <=> NH4[c] + OBU[m]                                                                                                                 | 0      | 1000  | 0      | 1000  | 0.019  | 0.025  |
| L_LYSII  | H2O[c] + CoA[m] + 3 NAD[m] + 2 AKG[m] + NADPH[m] + LYS[c] <=> 2 H[c] + CO2[c] + 3 NADH[m] + 2 GLU[m] + NADP[m] + GLUTCoA[m]                | 0      | 10000 | 0      | 10000 | 0.000  | 0.001  |
| L_TRYPII | 3 H2O[c] + NADPH[c] + CoA[m] + NAD[m] + 3 O2[c] + TRYP[c] <=> H[c] + 2 CO2[c] + NADP[c] + NADH[m] + ALA[c] + NH4[c] + GLUTCoA[m] + FORM[c] | 0      | 10000 | 0      | 10000 | 0.066  | 0.028  |
| L_GLUCOA | H2O[c] + CoA[m] + NAD[m] + FAD[m] + GLUTCoA[m] <=> CO2[c] + 2 AcCoA[m] + NADH[m] + FADH2[m]                                                | 0      | 10000 | 0      | 10000 | 0.066  | 0.029  |
| L_MET1   | ATP[c] + 2 H2O[c] + THF[c] + MET[c] <=> H[c] + Pi[c] + Ad[c] + HCYS[c] + MTHF[c] + PPI[c]                                                  | 0      | 10000 | 0      | 10000 | 0.004  | 0.010  |
| L_HCYS   | SER[c] + HCYS[c] <=> NH4[c] + CYS[c] + OBU[m]                                                                                              | -10000 | 10000 | -10000 | 10000 | 0.004  | 0.010  |
| T_OBU    | OBU[m] <=> OBU[c]                                                                                                                          | -10000 | 10000 | -10000 | 10000 | 0.023  | 0.036  |
| L_OBU    | CoA[m] + NAD[m] + OBU[m] <=> CO2[c] + NADH[m] + PROPCoA[m]                                                                                 | -10000 | 10000 | -10000 | 10000 | 0.000  | 0.000  |
| L_ILE1   | H2O[c] + 2 CoA[m] + 2 NAD[m] + FAD[m] + AKG[c] + ILE[c] <=> H[c] + CO2[c] + AcCoA[m] + 2 NADH[m] + FADH2[m] + GLU[c] + PROPCoA[m]          | 0      | 10000 | 0      | 10000 | 0.081  | 0.077  |
| L_VAL1   | 2 H2O[c] + CoA[m] + 3 NAD[m] + FAD[m] + AKG[c] + VAL[c] <=> 2 H[c] + 2 CO2[c] + 3 NADH[m] +                                                | 0      | 10000 | 0      | 10000 | 0.031  | 0.096  |

|           |                                                                                                             |        |       |        |       |        |        |
|-----------|-------------------------------------------------------------------------------------------------------------|--------|-------|--------|-------|--------|--------|
|           | FADH2[m] + GLU[c] + PROPCoA[m]                                                                              |        |       |        |       |        |        |
| L_PropCoA | CO2[c] + H2O[c] + PROPCoA[m] + ATP[m] <=> 2 H[c] + Pi[c] + SUCCoA[m] + ADP[m]                               | 0      | 10000 | 0      | 10000 | 0.112  | 0.173  |
| L_PHE1    | H[c] + NADH[m] + O2[c] + PHE[c] <=> H2O[c] + NAD[m] + TYR[c]                                                | -10000 | 10000 | -10000 | 10000 | 0.013  | 0.049  |
| L_TYR1    | H2O[c] + AKG[m] + 2 O2[c] + TYR[c] <=> 2 H[c] + CO2[c] + FUM[m] + GLU[m] + AcAc[m]                          | 0      | 10000 | 0      | 10000 | 0.132  | 0.116  |
| L_ACAC1   | CoA[m] + SUCCoA[m] + AcAc[m] <=> 2 AcCoA[m] + SUC[m]                                                        | 0      | 10000 | 0      | 10000 | 0.132  | 0.130  |
| L_HIS1    | 2 H[c] + 2 H2O[c] + THF[c] + HIS[c] <=> 2 NH4[c] + GLU[m] + MYLTHF[c]                                       | 0      | 10000 | 0      | 10000 | 0.012  | 0.011  |
| L_LEU1    | CoA[m] + NAD[m] + AKG[m] + LEU[c] <=> CO2[c] + NADH[m] + GLU[m] + IVACoA[m]                                 | 0      | 10000 | 0      | 10000 | 0.057  | 0.116  |
| L_LEU2    | CO2[c] + 2 H2O[c] + FAD[m] + ATP[m] + IVACoA[m] <=> 2 H[c] + Pi[c] + AcCoA[m] + FADH2[m] + ADP[m] + AcAc[m] | 0      | 10000 | 0      | 10000 | 0.000  | 0.013  |
| Eiva      | H2O[c] + IVACoA[m] <=> H[c] + CoA[m] + IVA[m]                                                               | 0      | 10000 | 0      | 10000 | 0.057  | 0.103  |
| T_IVA     | IVA[m] <=> IVA[c]                                                                                           | -10000 | 10000 | -10000 | 10000 | 0.057  | 0.103  |
| 6_3_1_2   | ATP[c] + GLU[c] + NH4[c] <=> ADP[c] + H[c] + Pi[c] + GLN[c]                                                 | 0      | 10000 | 0      | 10000 | 0.240  | 0.358  |
| L_PRO_S   | ATP[c] + 2 H[c] + 2 NADH[c] + GLU[c] <=> ADP[c] + H2O[c] + Pi[c] + 2 NAD[c] + PRO[c]                        | 0      | 10000 | 0      | 10000 | 0.972  | 2.167  |
| 1_14_11_2 | AKG[c] + PRO[c] + O2[c] <=> CO2[c] + SUC[m] + HYP[c]                                                        | 0      | 10000 | 0      | 10000 | 0.135  | 0.102  |
| L_SER_S   | H2O[c] + 3PG[c] + NAD[c] + GLU[c] <=> H[c] + Pi[c] + NADH[c] + AKG[c] + SER[c]                              | -10000 | 10000 | -10000 | 10000 | -0.063 | 0.000  |
| 6_3_5_4   | ATP[c] + H2O[c] + ASP[c] + GLN[c] <=> H[c] + GLU[c] + ASN[c] + PPi[c] + AMP[c]                              | 0      | 10000 | 0      | 10000 | 0.000  | 0.000  |
| 3_5_3_1a  | H2O[c] + ARG[c] <=> ORN[c] + Urea[c]                                                                        | 0      | 10000 | 0      | 10000 | 0.000  | 0.000  |
| T_ORn     | ORN[c] <=> ORN[m]                                                                                           | -10000 | 10000 | -10000 | 10000 | 0.000  | 0.000  |
| 6_3_4_16  | CO2[c] + H2O[c] + NH4[c] + 2 ATP[m] <=> 3 H[c] + Pi[c] + 2 ADP[m] + CaP[m]                                  | 0      | 10000 | 0      | 10000 | 0.045  | 0.026  |
| 2_1_3_3   | ORN[m] + CaP[m] <=> H[c] + Pi[c] + Citr[m]                                                                  | -10000 | 10000 | -10000 | 10000 | 0.045  | 0.026  |
| T_CITR    | Citr[m] <=> Citr[c]                                                                                         | -10000 | 10000 | -10000 | 10000 | 0.045  | 0.026  |
| 6_3_4_5   | ATP[c] + ASP[c] + Citr[c] <=> PPi[c] + AMP[c] + ArgSuc[c]                                                   | 0      | 10000 | 0      | 10000 | 0.045  | 0.026  |
| 4_3_2_1   | ArgSuc[c] <=> H[c] + ARG[c] + FUM[c]                                                                        | -10000 | 10000 | -10000 | 10000 | 0.045  | 0.026  |
| 4_2_1_2a  | H2O[c] + FUM[c] <=> MAL[c]                                                                                  | -10000 | 10000 | -10000 | 10000 | 0.118  | 0.081  |
| 2_6_1_13  | AKG[m] + ORN[m] <=> GLU[m] + G5S[m]                                                                         | -10000 | 10000 | -10000 | 10000 | -0.045 | -0.026 |

|           |                                                                                                                                                                                            |        |       |        |       |        |         |
|-----------|--------------------------------------------------------------------------------------------------------------------------------------------------------------------------------------------|--------|-------|--------|-------|--------|---------|
| 3_5_4_9b  | ATP[c] + THF[c] + FORM[c] <=> ADP[c] + Pi[c] + N10FTHF[c]                                                                                                                                  | -10000 | 10000 | -10000 | 10000 | -0.191 | -0.108  |
| 3_5_4_9a  | H2O[c] + MYLTHF[c] <=> H[c] + N10FTHF[c]                                                                                                                                                   | -10000 | 10000 | -10000 | 10000 | 0.334  | 0.193   |
| 1_5_1_15  | NADH[c] + MYLTHF[c] <=> NAD[c] + METHF[c]                                                                                                                                                  | -10000 | 10000 | -10000 | 10000 | -0.322 | -0.181  |
| 1_5_1_20  | H[c] + NADPH[c] + METHF[c] <=> NADP[c] + MTHF[c]                                                                                                                                           | -10000 | 10000 | -10000 | 10000 | -0.004 | -0.010  |
| 1_5_1_6   | H2O[c] + NAD[c] + N10FTHF[c] <=> H[c] + CO2[c] + NADH[c] + THF[c]                                                                                                                          | 0      | 10000 | 0      | 10000 | 0.000  | 0.000   |
| T_MAL     | MAL[c] <=> MAL[m]                                                                                                                                                                          | -10000 | 10000 | -10000 | 10000 | 4.338  | 4.234   |
| T_GLU     | GLU[c] <=> GLU[m]                                                                                                                                                                          | -10000 | 10000 | -10000 | 10000 | -1.270 | -1.943  |
| 1_1_1_37a | NAD[c] + MAL[c] <=> H[c] + NADH[c] + OXA[c]                                                                                                                                                | -10000 | 10000 | -10000 | 10000 | -2.553 | -2.512  |
| SLC25A11  | AKG[m] + MAL[c] <=> MAL[m] + AKG[c]                                                                                                                                                        | -10000 | 10000 | -10000 | 10000 | 0.014  | 0.271   |
| 2_6_1_1b  | OXA[m] + GLU[m] <=> AKG[m] + ASP[m]                                                                                                                                                        | -10000 | 10000 | -10000 | 10000 | -0.014 | -0.179  |
| SLC1A3    | GLU[c] + ASP[m] <=> ASP[c] + GLU[m]                                                                                                                                                        | -10000 | 10000 | -10000 | 10000 | -0.014 | -0.179  |
| 2_6_1_1a  | OXA[c] + GLU[c] <=> AKG[c] + ASP[c]                                                                                                                                                        | -10000 | 10000 | -10000 | 10000 | -0.524 | -0.179  |
| 1_6_1_2   | NADPH[c] + NAD[c] <=> NADP[c] + NADH[c]                                                                                                                                                    | 0      | 10000 | 0      | 10000 | 0.000  | 0.000   |
| 1_6_1_2b  | NAD[m] + NADPH[m] <=> NADH[m] + NADP[m]                                                                                                                                                    | 0      | 10000 | 0      | 10000 | 0.582  | 1.942   |
| L_NADH1   | 4 H[c] + 3 Pi[c] + NADH[m] + 0.5 O2[c] + 3 ADP[m] <=> 4 H2O[c] + NAD[m] + 3 ATP[m]                                                                                                         | 0      | 10000 | 0      | 10000 | 20.318 | 33.064  |
| L_FAD1    | 2 H[c] + 2 Pi[c] + FADH2[m] + 0.5 O2[c] + 2 ADP[m] <=> 3 H2O[c] + FAD[m] + 2 ATP[m]                                                                                                        | 0      | 10000 | 0      | 10000 | 3.629  | 5.714   |
| T_ADPATP  | ADP[c] + ATP[m] <=> ATP[c] + ADP[m]                                                                                                                                                        | -10000 | 10000 | -10000 | 10000 | 68.011 | 110.382 |
| 2_7_4_6   | ATP[c] + GDP[c] <=> ADP[c] + GTP[c]                                                                                                                                                        | -10000 | 10000 | -10000 | 10000 | -2.652 | -5.077  |
| 2_7_4_3   | ATP[c] + AMP[c] <=> 2 ADP[c]                                                                                                                                                               | 0      | 10000 | 0      | 10000 | 0.221  | 0.137   |
| 2_7_1_20  | ATP[c] + Ad[c] <=> ADP[c] + H[c] + AMP[c]                                                                                                                                                  | -10000 | 10000 | -10000 | 10000 | 0.004  | 0.010   |
| 3_6_1_3   | ATP[c] + H2O[c] <=> ADP[c] + H[c] + Pi[c]                                                                                                                                                  | 0      | 10000 | 0      | 10000 | 52.380 | 97.266  |
| 3_6_1_1   | H2O[c] + PPI[c] <=> H[c] + 2 Pi[c]                                                                                                                                                         | 0      | 10000 | 0      | 10000 | 0.149  | 0.095   |
| L_ATP1    | 6 ATP[c] + CO2[c] + H2O[c] + R5P[c] + GTP[c] + 2 ASP[c] + 2 GLN[c] + GLY[c] + 2 N10FTHF[c] <=><br>6 ADP[c] + 10 H[c] + 5 Pi[c] + GDP[c] + 2 GLU[c] + 2 THF[c] + PPI[c] + AMP[c] + 2 FUM[c] | 0      | 10000 | 0      | 10000 | 0.043  | 0.025   |
| L_GTP     | 8 ATP[c] + CO2[c] + 2 H2O[c] + R5P[c] + NAD[c] + NH4[c] + ASP[c] + 2 GLN[c] + GLY[c] + 2 N10FTHF[c]                                                                                        | 0      | 10000 | 0      | 10000 | 0.029  | 0.017   |

|         |                                                                                                                                                                                                                                                                                                           |        |       |        |       |       |       |
|---------|-----------------------------------------------------------------------------------------------------------------------------------------------------------------------------------------------------------------------------------------------------------------------------------------------------------|--------|-------|--------|-------|-------|-------|
|         | $\Leftrightarrow 6 \text{ ADP}[c] + 11 \text{ H}[c] + 4 \text{ Pi}[c] + \text{ NADH}[c] + \text{ GTP}[c] + 2 \text{ GLU}[c] + 2 \text{ THF}[c] + 2 \text{ PPI}[c] + 2 \text{ AMP}[c] + \text{ FUM}[c]$                                                                                                    |        |       |        |       |       |       |
| L_UTP2  | $3 \text{ ATP}[c] + \text{ R5P}[c] + \text{ ASP}[c] + \text{ GLN}[c] + 0.5 \text{ O2}[c] \Leftrightarrow 2 \text{ ADP}[c] + 2 \text{ H}[c] + \text{ H2O}[c] + 2 \text{ Pi}[c] + \text{ GLU}[c] + \text{ AMP}[c] + \text{ UTP}[c]$                                                                         | 0      | 10000 | 0      | 10000 | 0.072 | 0.042 |
| 6_3_4_2 | $\text{ ATP}[c] + \text{ NH4}[c] + \text{ UTP}[c] \Leftrightarrow \text{ ADP}[c] + 2 \text{ H}[c] + \text{ Pi}[c] + \text{ CTP}[c]$                                                                                                                                                                       | 0      | 10000 | 0      | 10000 | 0.029 | 0.017 |
| L_RNA1  | $0.3 \text{ ATP}[c] + \text{ H2O}[c] + 0.2 \text{ GTP}[c] + 0.3 \text{ UTP}[c] + 0.2 \text{ CTP}[c] \Leftrightarrow \text{ H}[c] + 2 \text{ Pi}[c] + \text{ RNA}[c]$                                                                                                                                      | 0      | 10000 | 0      | 10000 | 0.112 | 0.085 |
| L_DNA2  | $0.3 \text{ ATP}[c] + 0.3 \text{ H}[c] + \text{ NADPH}[c] + 0.3 \text{ NADH}[c] + 0.2 \text{ GTP}[c] + 0.3 \text{ METHF}[c] + 0.3 \text{ UTP}[c] + 0.2 \text{ CTP}[c] \Leftrightarrow \text{ NADP}[c] + 2 \text{ Pi}[c] + 0.3 \text{ NAD}[c] + 0.3 \text{ THF}[c] + \text{ DNA}[c]$                       | 0      | 10000 | 0      | 10000 | 0.031 | 0.000 |
| L_TC1   | $\text{ ATP}[c] + \text{ G6P}[c] + \text{ H2O}[c] \Leftrightarrow \text{ ADP}[c] + \text{ H}[c] + 2 \text{ Pi}[c] + \text{ TC}[c]$                                                                                                                                                                        | 0      | 10000 | 0      | 10000 | 0.139 | 0.128 |
| T_CIT   | $\text{ CIT}[m] \Leftrightarrow \text{ CIT}[c]$                                                                                                                                                                                                                                                           | -10000 | 10000 | -10000 | 10000 | 2.046 | 2.363 |
| 4_1_3_8 | $\text{ ATP}[c] + \text{ CIT}[c] + \text{ CoA}[c] \Leftrightarrow \text{ ADP}[c] + \text{ Pi}[c] + \text{ OXA}[c] + \text{ AcCoA}[c]$                                                                                                                                                                     | 0      | 10000 | 0      | 10000 | 2.029 | 2.332 |
| L_C14_0 | $6 \text{ ATP}[c] + 5 \text{ H}[c] + \text{ H2O}[c] + 12 \text{ NADPH}[c] + 7 \text{ AcCoA}[c] \Leftrightarrow 6 \text{ ADP}[c] + 12 \text{ NADP}[c] + 6 \text{ Pi}[c] + 7 \text{ CoA}[c] + \text{ FA14}_0[c]$                                                                                            | 0      | 10000 | 0      | 10000 | 0.003 | 0.004 |
| L_C16_0 | $7 \text{ ATP}[c] + 6 \text{ H}[c] + \text{ H2O}[c] + 14 \text{ NADPH}[c] + 8 \text{ AcCoA}[c] \Leftrightarrow 7 \text{ ADP}[c] + 14 \text{ NADP}[c] + 7 \text{ Pi}[c] + 8 \text{ CoA}[c] + \text{ FA16}_0[c]$                                                                                            | 0      | 10000 | 0      | 10000 | 0.146 | 0.169 |
| L_C16_1 | $\text{ H}[c] + \text{ NADH}[c] + \text{ O2}[c] + \text{ FA16}_0[c] \Leftrightarrow 2 \text{ H2O}[c] + \text{ NAD}[c] + \text{ FA16}_1[c]$                                                                                                                                                                | 0      | 10000 | 0      | 10000 | 0.024 | 0.028 |
| L_C18_0 | $\text{ ATP}[c] + \text{ H}[c] + 2 \text{ NADPH}[c] + \text{ AcCoA}[c] + \text{ FA16}_0[c] \Leftrightarrow \text{ ADP}[c] + 2 \text{ NADP}[c] + \text{ Pi}[c] + \text{ CoA}[c] + \text{ FA18}_0[c]$                                                                                                       | 0      | 10000 | 0      | 10000 | 0.092 | 0.107 |
| L_C18_1 | $\text{ H}[c] + \text{ NADH}[c] + \text{ O2}[c] + \text{ FA18}_0[c] \Leftrightarrow 2 \text{ H2O}[c] + \text{ NAD}[c] + \text{ OLE}[c]$                                                                                                                                                                   | 0      | 10000 | 0      | 10000 | 0.081 | 0.094 |
| L_C20_0 | $\text{ ATP}[c] + \text{ H}[c] + 2 \text{ NADPH}[c] + \text{ AcCoA}[c] + \text{ FA18}_0[c] \Leftrightarrow \text{ ADP}[c] + 2 \text{ NADP}[c] + \text{ Pi}[c] + \text{ CoA}[c] + \text{ FA20}_0[c]$                                                                                                       | 0      | 10000 | 0      | 10000 | 0.002 | 0.003 |
| L_C20_1 | $\text{ H}[c] + \text{ NADH}[c] + \text{ O2}[c] + \text{ FA20}_0[c] \Leftrightarrow 2 \text{ H2O}[c] + \text{ NAD}[c] + \text{ FA20}_1[c]$                                                                                                                                                                | 0      | 10000 | 0      | 10000 | 0.002 | 0.002 |
| L_PHOA1 | $3 \text{ H}[c] + \text{ GAP}[c] + \text{ NADH}[c] + 0.044 \text{ FA14}_0[c] + 0.402 \text{ FA16}_0[c] + 0.32 \text{ FA16}_1[c] + 0.115 \text{ FA18}_0[c] + 1.086 \text{ OLE}[c] + 0.005 \text{ FA20}_0[c] + 0.028 \text{ FA20}_1[c] \Leftrightarrow 2 \text{ H2O}[c] + \text{ NAD}[c] + \text{ PHOA}[c]$ | 0      | 10000 | 0      | 10000 | 0.075 | 0.086 |
| L_CHOL1 | $18 \text{ ATP}[c] + 7 \text{ H}[c] + 30 \text{ NADPH}[c] + 11 \text{ O2}[c] + 18 \text{ AcCoA}[c] \Leftrightarrow 18 \text{ ADP}[c] + 8 \text{ CO2}[c] + 3 \text{ H2O}[c] + 30 \text{ NADP}[c] + 18 \text{ Pi}[c] + \text{ FORM}[c] + 18 \text{ CoA}[c] + \text{ CHOL}[c]$                               | 0      | 10000 | 0      | 10000 | 0.041 | 0.047 |

|            |                                                                                                                                                                                                                                                                                                                                                                                                                                                                                                            |        |       |        |       |         |         |
|------------|------------------------------------------------------------------------------------------------------------------------------------------------------------------------------------------------------------------------------------------------------------------------------------------------------------------------------------------------------------------------------------------------------------------------------------------------------------------------------------------------------------|--------|-------|--------|-------|---------|---------|
| L_PROT2    | 4.3 ATP[c] + 3.3 H2O[c] + 0.08 ALA[c] + 0.06 GLU[c] + 0.04 ASN[c] + 0.048 ASP[c] + 0.058 GLN[c] + 0.053 PRO[c] + 0.015 CYS[c] + 0.091 GLY[c] + 0.059 SER[c] + 0.052 THR[c] + 0.069 LYS[c] + 0.008 TRYP[c] + 0.018 MET[c] + 0.043 ILE[c] + 0.061 VAL[c] + 0.034 PHE[c] + 0.025 TYR[c] + 0.02 HIS[c] + 0.081 LEU[c] + 0.035 HYP[c] + 0.049 ARG[c] <=> 4.3 ADP[c] + 4.3 H[c] + 4.3 Pi[c] + Protein[c]                                                                                                         | 0      | 10000 | 0      | 10000 | 3.846   | 2.906   |
| L_BIOMASS1 | 0.153 RNA[c] + 0.042 DNA[c] + 0.19 TC[c] + 0.102 PHOA[c] + 0.056 CHOL[c] + 5.241 Protein[c] <=> BIOMASS[e]                                                                                                                                                                                                                                                                                                                                                                                                 | 0      | 10000 | 0      | 0     | 0.734   | 0.000   |
| L_BIO_size | 0.13 RNA[c] + 0.197 TC[c] + 0.133 PHOA[c] + 0.072 CHOL[c] + 4.47 Protein[c] <=> BIOMASS[e]                                                                                                                                                                                                                                                                                                                                                                                                                 | 0      | 0     | 0      | 10000 | 0.000   | 0.650   |
| L_MoAB1    | 4.3 ATP[c] + 0.012 G6P[c] + 3.3 H2O[c] + 0.0015 NADPH[c] + 0.0015 PEP[c] + 0.067 ALA[c] + 0.0442 GLU[c] + 0.0351 ASN[c] + 0.0413 ASP[c] + 0.0643 GLN[c] + 0.0671 PRO[c] + 0.0248 CYS[c] + 0.07 GLY[c] + 0.0548 SER[c] + 0.0816 THR[c] + 0.0723 LYS[c] + 0.0155 TRYP[c] + 0.0145 MET[c] + 0.0465 ILE[c] + 0.089 VAL[c] + 0.0372 PHE[c] + 0.0424 TYR[c] + 0.0155 HIS[c] + 0.071 LEU[c] + 0.0455 ARG[c] + 0.0075 AcCoA[c] <=> 4.3 ADP[c] + 4.3 H[c] + 0.0015 NADP[c] + 4.3135 Pi[c] + 0.0075 CoA[c] + PROD[c] | 0      | 10000 | 0      | 10000 | 0.064   | 0.145   |
| MT_H2O     | H2O[c] <=> H2O[e]                                                                                                                                                                                                                                                                                                                                                                                                                                                                                          | -10000 | 10000 | -10000 | 10000 | 18.181  | 24.848  |
| MT_Pi      | Pi[c] <=> Pi[e]                                                                                                                                                                                                                                                                                                                                                                                                                                                                                            | -10000 | 10000 | -10000 | 10000 | -0.218  | -0.171  |
| MT_SO4     | SO4[c] <=> SO4[e]                                                                                                                                                                                                                                                                                                                                                                                                                                                                                          | -10000 | 10000 | -10000 | 10000 | 0.188   | 0.102   |
| MT_H       | H[c] <=> H[e]                                                                                                                                                                                                                                                                                                                                                                                                                                                                                              | -10000 | 10000 | -10000 | 10000 | 2.904   | -0.344  |
| MT_O2      | O2[c] <=> O2[e]                                                                                                                                                                                                                                                                                                                                                                                                                                                                                            | -10000 | 10000 | -10000 | 10000 | -13.553 | -20.720 |
| MT_CO2     | CO2[c] <=> CO2[e]                                                                                                                                                                                                                                                                                                                                                                                                                                                                                          | -10000 | 10000 | -10000 | 10000 | 15.083  | 22.335  |
| MT_Glc     | Glc[c] <=> GLc[e]                                                                                                                                                                                                                                                                                                                                                                                                                                                                                          | -10000 | 10000 | -10000 | 10000 | -4.489  | -4.069  |
| MT_Lac     | LAC[c] <=> LAC[e]                                                                                                                                                                                                                                                                                                                                                                                                                                                                                          | -10000 | 10000 | -10000 | 10000 | 3.103   | -0.201  |
| MT_PYR     | PYR[c] <=> PYR[e]                                                                                                                                                                                                                                                                                                                                                                                                                                                                                          | -10000 | 10000 | -10000 | 10000 | 0.003   | 0.002   |
| MT_ACE     | ACE[c] <=> ACE[e]                                                                                                                                                                                                                                                                                                                                                                                                                                                                                          | 0      | 10000 | 0      | 10000 | 0.051   | 0.216   |
| MT_FORM    | FORM[c] <=> FORM[e]                                                                                                                                                                                                                                                                                                                                                                                                                                                                                        | -10000 | 10000 | -10000 | 10000 | 0.298   | 0.183   |
| MT_FUM     | FUM[c] <=> FUM[e]                                                                                                                                                                                                                                                                                                                                                                                                                                                                                          | -10000 | 10000 | -10000 | 10000 | 0.041   | 0.012   |
| MT_SUC     | SUC[c] <=> SUC[e]                                                                                                                                                                                                                                                                                                                                                                                                                                                                                          | -10000 | 10000 | -10000 | 10000 | -0.490  | -0.166  |



|         |                     |        |       |        |       |        |        |
|---------|---------------------|--------|-------|--------|-------|--------|--------|
| MT_CIT  | CIT[c] <=> CIT[e]   | -10000 | 10000 | -10000 | 10000 | 0.016  | 0.031  |
| MT_OBU  | OBU[c] <=> OBU[e]   | -10000 | 10000 | -10000 | 10000 | 0.023  | 0.036  |
| MT_IVA  | IVA[c] <=> IVA[e]   | -10000 | 10000 | -10000 | 10000 | 0.057  | 0.103  |
| MT_NH4  | NH4[c] <=> NH4[e]   | -10000 | 10000 | -10000 | 10000 | 0.380  | 0.545  |
| MT_LYS  | LYS[c] <=> LYS[e]   | -10000 | 10000 | -10000 | 10000 | -0.270 | -0.212 |
| MT_TRP  | TRYP[c] <=> TRYP[e] | -10000 | 10000 | -10000 | 10000 | -0.098 | -0.053 |
| MT_ILE  | ILE[c] <=> ILE[e]   | -10000 | 10000 | -10000 | 10000 | -0.249 | -0.208 |
| MT_VAL  | VAL[c] <=> VAL[e]   | -10000 | 10000 | -10000 | 10000 | -0.271 | -0.287 |
| MT_LEU  | LEU[c] <=> LEU[e]   | -10000 | 10000 | -10000 | 10000 | -0.373 | -0.362 |
| MT_PHE  | PHE[c] <=> PHE[e]   | -10000 | 10000 | -10000 | 10000 | -0.146 | -0.154 |
| MT_TYR  | TYR[c] <=> TYR[e]   | -10000 | 10000 | -10000 | 10000 | -0.218 | -0.146 |
| MT_HIS  | HIS[c] <=> HIS[e]   | -10000 | 10000 | -10000 | 10000 | -0.090 | -0.072 |
| MT_THR  | THR[c] <=> THR[e]   | -10000 | 10000 | -10000 | 10000 | -0.251 | -0.208 |
| MT_SER  | SER[c] <=> SER[e]   | -10000 | 10000 | -10000 | 10000 | -0.709 | -0.588 |
| MT_GLY  | GLY[c] <=> GLY[e]   | -10000 | 10000 | -10000 | 10000 | 0.096  | 0.046  |
| MT_Gln  | GLN[c] <=> GLN[e]   | -10000 | 10000 | -10000 | 10000 | -0.202 | 0.054  |
| MT_GLU  | GLU[c] <=> GLU[e]   | -10000 | 10000 | -10000 | 10000 | -0.069 | -0.288 |
| MT_ALA  | ALA[c] <=> ALA[e]   | -10000 | 10000 | -10000 | 10000 | 0.574  | -0.032 |
| MT_PRO  | PRO[c] <=> PRO[e]   | -10000 | 10000 | -10000 | 10000 | -0.186 | -0.170 |
| MT_ASN  | ASN[c] <=> ASN[e]   | -10000 | 10000 | -10000 | 10000 | -1.005 | -0.516 |
| MT_ASP  | ASP[c] <=> ASP[e]   | -10000 | 10000 | -10000 | 10000 | -0.107 | -0.245 |
| MT_Cys  | CYS[c] <=> CYS[e]   | -10000 | 10000 | -10000 | 10000 | -0.243 | -0.139 |
| MT_MET  | MET[c] <=> MET[e]   | -10000 | 10000 | -10000 | 10000 | -0.074 | -0.065 |
| MT_ARG  | ARG[c] <=> ARG[e]   | -10000 | 10000 | -10000 | 10000 | -0.146 | -0.123 |
| MT_Urea | Urea[c] <=> Urea[e] | -10000 | 10000 | -10000 | 10000 | 0.000  | 0.000  |

|         |                     |        |        |        |        |         |         |
|---------|---------------------|--------|--------|--------|--------|---------|---------|
| MT_Prod | PROD[c] <=> PROD[e] | 0      | 10000  | 0      | 10000  | 0.064   | 0.145   |
| Ex_H2O  | H2O[e] <=>          | -10000 | 10000  | -10000 | 10000  | 18.181  | 24.848  |
| Ex_Pi   | Pi[e] <=>           | -10000 | 10000  | -10000 | 10000  | -0.218  | -0.171  |
| Ex_SO4  | SO4[e] <=>          | -10000 | 10000  | -10000 | 10000  | 0.188   | 0.102   |
| Ex_H    | H[e] <=>            | -10000 | 10000  | -10000 | 10000  | 2.904   | -0.344  |
| Ex_O2   | O2[e] <=>           | -10000 | 10000  | -10000 | 10000  | -13.553 | -20.720 |
| Ex_CO2  | CO2[e] <=>          | -10000 | 10000  | -10000 | 10000  | 15.083  | 22.335  |
| Ex_GLc  | GLc[e] <=>          | -4.623 | -4.489 | -4.134 | -4.069 | -4.489  | -4.069  |
| Ex_LAC  | LAC[e] <=>          | 3.068  | 3.103  | -0.308 | -0.201 | 3.103   | -0.201  |
| Ex_PYR  | PYR[e] <=>          | -0.020 | 0.003  | -0.041 | 0.002  | 0.003   | 0.002   |
| Ex_ACE  | ACE[e] <=>          | 0.044  | 0.051  | 0.179  | 0.216  | 0.051   | 0.216   |
| Ex_FORM | FORM[e] <=>         | 0.272  | 0.298  | 0.161  | 0.183  | 0.298   | 0.183   |
| Ex_FUM  | FUM[e] <=>          | 0.037  | 0.041  | 0.010  | 0.012  | 0.041   | 0.012   |
| Ex_SUC  | SUC[e] <=>          | -0.511 | -0.490 | -0.184 | -0.166 | -0.490  | -0.166  |
| Ex_CIT  | CIT[e] <=>          | 0.006  | 0.016  | 0.024  | 0.031  | 0.016   | 0.031   |
| Ex_OBU  | OBU[e] <=>          | 0.014  | 0.023  | 0.029  | 0.036  | 0.023   | 0.036   |
| Ex_IVA  | IVA[e] <=>          | 0.049  | 0.057  | 0.091  | 0.103  | 0.057   | 0.103   |
| Ex_NH4  | NH4[e] <=>          | 0.380  | 0.440  | -0.250 | 1.000  | 0.380   | 0.545   |
| Ex_LYS  | LYS[e] <=>          | -0.270 | -0.213 | -0.224 | -0.212 | -0.270  | -0.212  |
| Ex_TRYP | TRYP[e] <=>         | -0.107 | -0.098 | -0.059 | -0.053 | -0.098  | -0.053  |
| Ex_ILE  | ILE[e] <=>          | -0.263 | -0.249 | -0.216 | -0.208 | -0.249  | -0.208  |
| Ex_VAL  | VAL[e] <=>          | -0.323 | -0.271 | -0.302 | -0.287 | -0.271  | -0.287  |
| Ex_LEU  | LEU[e] <=>          | -0.393 | -0.360 | -0.394 | -0.362 | -0.373  | -0.362  |
| Ex_PHE  | PHE[e] <=>          | -0.162 | -0.146 | -0.159 | -0.154 | -0.146  | -0.154  |
| Ex_TYR  | TYR[e] <=>          | -0.218 | -0.218 | -0.159 | -0.146 | -0.218  | -0.146  |

|            |                |        |        |        |        |        |        |
|------------|----------------|--------|--------|--------|--------|--------|--------|
| Ex_HIS     | HIS[e] <=>     | -0.090 | -0.082 | -0.079 | -0.072 | -0.090 | -0.072 |
| Ex_THR     | THR[e] <=>     | -0.269 | -0.251 | -0.233 | -0.208 | -0.251 | -0.208 |
| Ex_SER     | SER[e] <=>     | -0.734 | -0.709 | -0.650 | -0.588 | -0.709 | -0.588 |
| Ex_GLY     | GLY[e] <=>     | 0.096  | 0.141  | 0.025  | 0.046  | 0.096  | 0.046  |
| Ex_GLN     | GLN[e] <=>     | -0.251 | -0.174 | 0.041  | 0.054  | -0.202 | 0.054  |
| Ex_GLU     | GLU[e] <=>     | -0.091 | -0.069 | -0.411 | -0.288 | -0.069 | -0.288 |
| Ex_ALA     | ALA[e] <=>     | 0.459  | 0.574  | -0.073 | -0.032 | 0.574  | -0.032 |
| Ex_PRO     | PRO[e] <=>     | -0.244 | -0.186 | -0.185 | -0.170 | -0.186 | -0.170 |
| Ex_ASN     | ASN[e] <=>     | -1.005 | -0.941 | -0.558 | -0.516 | -1.005 | -0.516 |
| Ex_ASP     | ASP[e] <=>     | -0.143 | -0.107 | -0.250 | -0.245 | -0.107 | -0.245 |
| Ex_CYS     | CYS[e] <=>     | -0.262 | -0.243 | -0.152 | -0.139 | -0.243 | -0.139 |
| Ex_MET     | MET[e] <=>     | -0.084 | -0.074 | -0.069 | -0.065 | -0.074 | -0.065 |
| Ex_ARG     | ARG[e] <=>     | -0.146 | -0.132 | -0.131 | -0.123 | -0.146 | -0.123 |
| Ex_Urea    | Urea[e] <=>    | 0.000  | 0.000  | 0.000  | 0.000  | 0.000  | 0.000  |
| Ex_BIOMASS | BIOMASS[e] <=> | 0.720  | 0.750  | 0.530  | 0.650  | 0.734  | 0.650  |
| Ex_PROD    | PROD[e] <=>    | 0.064  | 0.075  | 0.136  | 0.145  | 0.064  | 0.145  |

## Flux variability analysis

| Abbreviation | Reaction                                                              | Flux variability analysis |           |          |           |
|--------------|-----------------------------------------------------------------------|---------------------------|-----------|----------|-----------|
|              |                                                                       | NI Min                    | NI Max    | SI Min   | SI Max    |
| 2_7_1_1      | Glc[c] + ATP[c] <=> ADP[c] + H[c] + G6P[c]                            | 4.489                     | 4.623     | 4.069    | 4.134     |
| L_PPP1       | G6P[c] + H2O[c] + 2 NADP[c] <=> 2 H[c] + CO2[c] + R5P[c] + 2 NADPH[c] | 0.000                     | 13.212    | 0.000    | 21.575    |
| L_R5P1       | R5P[c] <=> X5P[c]                                                     | -0.095                    | 8.713     | -0.056   | 14.327    |
| 2_2_1_1a     | R5P[c] + X5P[c] <=> S7P[c] + GAP[c]                                   | -0.048                    | 4.356     | -0.028   | 7.164     |
| 2_2_1_2      | S7P[c] + GAP[c] <=> E4P[c] + F6P[c]                                   | -0.048                    | 4.356     | -0.028   | 7.164     |
| 2_2_1_1b     | X5P[c] + E4P[c] <=> GAP[c] + F6P[c]                                   | -0.048                    | 4.356     | -0.028   | 7.164     |
| 5_3_1_9      | G6P[c] <=> F6P[c]                                                     | -8.730                    | 4.482     | -17.571  | 4.004     |
| 2_7_1_11     | ATP[c] + F6P[c] <=> ADP[c] + H[c] + F16P[c]                           | 0.000                     | 75.288    | 0.000    | 126.030   |
| 3_1_3_11     | H2O[c] + F16P[c] <=> F6P[c] + Pi[c]                                   | 0.000                     | 70.901    | 0.000    | 122.082   |
| L_GLC1       | F16P[c] <=> 2 GAP[c]                                                  | -0.017                    | 4.387     | -3.244   | 3.948     |
| L_GLC2       | ADP[c] + GAP[c] + Pi[c] + NAD[c] <=> ATP[c] + H[c] + 3PG[c] + NADH[c] | 4.247                     | 8.651     | 0.589    | 7.781     |
| L_GLC3       | 3PG[c] <=> H2O[c] + PEP[c]                                            | -62.182                   | 8.775     | -114.057 | 8.038     |
| 2_7_1_40     | ADP[c] + H[c] + PEP[c] <=> ATP[c] + PYR[c]                            | 0.000                     | 10000.000 | 0.000    | 10000.000 |
| 1_1_1_27     | H[c] + NADH[c] + PYR[c] <=> NAD[c] + LAC[c]                           | 3.068                     | 3.103     | -0.308   | -0.201    |
| T_Pyr        | PYR[c] <=> PYR[m]                                                     | -22.362                   | 10000.000 | -38.054  | 10000.000 |
| E012         | PYR[m] + CoA[m] + NAD[m] <=> CO2[c] + AcCoA[m] + NADH[m]              | 1.802                     | 6.340     | 2.017    | 9.276     |
| 3_1_2_1      | H2O[c] + AcCoA[m] <=> H[c] + CoA[m] + ACE[m]                          | 0.044                     | 0.051     | 0.179    | 0.216     |
| T_ACE        | ACE[m] <=> ACE[c]                                                     | 0.044                     | 0.051     | 0.179    | 0.216     |
| 4_1_3_7      | H2O[c] + AcCoA[m] + OXA[m] <=> H[c] + CoA[m] + CIT[m]                 | 2.420                     | 6.923     | 2.524    | 9.729     |
| L_TCA1       | NAD[m] + CIT[m] <=> CO2[c] + NADH[m] + AKG[m]                         | 0.385                     | 4.887     | 0.168    | 7.373     |
| L_TCA2       | CoA[m] + NAD[m] + AKG[m] <=> CO2[c] + NADH[m] + SUCCoA[m]             | 0.000                     | 4.404     | 0.000    | 7.197     |

|           |                                                                                                                                            |            |           |            |           |
|-----------|--------------------------------------------------------------------------------------------------------------------------------------------|------------|-----------|------------|-----------|
| 6_2_1_4   | Pi[c] + SUCCoA[m] + GDP[c] <=> CoA[m] + SUC[m] + GTP[c]                                                                                    | 0.000      | 4.436     | 0.000      | 7.222     |
| 1_3_99_1  | SUC[m] + FAD[m] <=> FADH2[m] + FUM[m]                                                                                                      | 0.756      | 5.259     | 0.415      | 7.702     |
| 4_2_1_2b  | H2O[c] + FUM[m] <=> MAL[m]                                                                                                                 | 0.888      | 5.408     | 0.531      | 7.838     |
| 1_1_1_37b | NAD[m] + MAL[m] <=> H[c] + NADH[m] + OXA[m]                                                                                                | -132.470   | 10000.000 | -229.809   | 10000.000 |
| 6_4_1_1   | ATP[c] + CO2[c] + H2O[c] + PYR[m] <=> ADP[c] + 2 H[c] + Pi[c] + OXA[m]                                                                     | 0.000      | 70.901    | 0.000      | 122.082   |
| 4_1_1_32a | CO2[c] + PEP[c] + GDP[c] <=> GTP[c] + OXA[c]                                                                                               | -10000.000 | 0.000     | -10000.000 | 0.000     |
| 1_1_1_40a | NADP[c] + MAL[c] <=> CO2[c] + NADPH[c] + PYR[c]                                                                                            | -22.820    | 9999.542  | -39.096    | 9999.010  |
| 1_1_1_40b | NAD[m] + MAL[m] <=> CO2[c] + PYR[m] + NADH[m]                                                                                              | -9998.406  | 90.414    | -9998.102  | 151.589   |
| T_SUC     | SUC[m] <=> SUC[c]                                                                                                                          | -0.511     | -0.490    | -0.184     | -0.166    |
| 2_6_1_2   | PYR[c] + GLU[c] <=> AKG[c] + ALA[c]                                                                                                        | 0.696      | 0.820     | 0.135      | 0.183     |
| 3_5_1_1   | H2O[c] + ASN[c] <=> NH4[c] + ASP[c]                                                                                                        | 0.785      | 24.419    | 0.395      | 41.091    |
| 3_5_1_2   | H2O[c] + GLN[c] <=> NH4[c] + GLU[m]                                                                                                        | 0.000      | 70.901    | 0.000      | 122.082   |
| 1_4_1_3a  | H2O[c] + NAD[m] + GLU[m] <=> H[c] + NADH[m] + AKG[m] + NH4[c]                                                                              | -70.855    | 0.066     | -121.077   | 1.012     |
| L_PRO1    | H2O[c] + NAD[m] + PRO[c] <=> H[c] + NADH[m] + G5S[m]                                                                                       | 0.233      | 71.159    | 0.122      | 122.241   |
| L_G5S1    | H2O[c] + G5S[m] + NADP[m] <=> 2 H[c] + GLU[m] + NADPH[m]                                                                                   | 0.188      | 71.099    | 0.104      | 122.216   |
| L_CYS1    | AKG[m] + NADPH[m] + 2 O2[c] + CYS[c] <=> H[c] + PYR[m] + GLU[m] + NADP[m] + SO4[c]                                                         | 0.188      | 0.217     | 0.102      | 0.120     |
| L_GLYCLE  | NAD[m] + GLY[c] + THF[c] <=> CO2[c] + NADH[m] + NH4[c] + METHF[c]                                                                          | -0.142     | 4.298     | -0.115     | 7.113     |
| 2_1_2_1a  | H2O[c] + GLY[c] + METHF[c] <=> THF[c] + SER[c]                                                                                             | -4.800     | -0.370    | -7.410     | -0.201    |
| 4_3_1_17  | SER[c] <=> PYR[c] + NH4[c]                                                                                                                 | 0.000      | 70.901    | 0.000      | 122.082   |
| L_THR1    | CoA[m] + NAD[m] + THR[c] <=> H[c] + AcCoA[m] + NADH[m] + GLY[c]                                                                            | 0.000      | 0.064     | 0.000      | 0.071     |
| 4_3_1_19  | THR[c] <=> NH4[c] + OBU[m]                                                                                                                 | 0.000      | 0.064     | 0.000      | 0.071     |
| L_LYSII   | H2O[c] + CoA[m] + 3 NAD[m] + 2 AKG[m] + NADPH[m] + LYS[c] <=> 2 H[c] + CO2[c] + 3 NADH[m] + 2 GLU[m] + NADP[m] + GLUTCoA[m]                | 0.000      | 0.000     | 0.001      | 0.014     |
| L_TRYPII  | 3 H2O[c] + NADPH[c] + CoA[m] + NAD[m] + 3 O2[c] + TRYP[c] <=> H[c] + 2 CO2[c] + NADP[c] + NADH[m] + ALA[c] + NH4[c] + GLUTCoA[m] + FORM[c] | 0.066      | 0.075     | 0.028      | 0.033     |

|           |                                                                                                                                   |        |        |        |         |
|-----------|-----------------------------------------------------------------------------------------------------------------------------------|--------|--------|--------|---------|
| L_GLUCOA  | H2O[c] + CoA[m] + NAD[m] + FAD[m] + GLUTCoA[m] <=> CO2[c] + 2 AcCoA[m] + NADH[m] + FADH2[m]                                       | 0.066  | 0.075  | 0.029  | 0.047   |
| L_MET1    | ATP[c] + 2 H2O[c] + THF[c] + MET[c] <=> H[c] + Pi[c] + Ad[c] + HCYS[c] + MTHF[c] + PPI[c]                                         | 0.004  | 0.014  | 0.010  | 0.015   |
| L_HCYS    | SER[c] + HCYS[c] <=> NH4[c] + CYS[c] + OBU[m]                                                                                     | 0.004  | 0.014  | 0.010  | 0.015   |
| T_OBU     | OBU[m] <=> OBU[c]                                                                                                                 | 0.014  | 0.023  | 0.029  | 0.036   |
| L_OBU     | CoA[m] + NAD[m] + OBU[m] <=> CO2[c] + NADH[m] + PROPCoA[m]                                                                        | -0.019 | 0.065  | -0.025 | 0.056   |
| L_ILE1    | H2O[c] + 2 CoA[m] + 2 NAD[m] + FAD[m] + AKG[c] + ILE[c] <=> H[c] + CO2[c] + AcCoA[m] + 2 NADH[m] + FADH2[m] + GLU[c] + PROPCoA[m] | 0.081  | 0.094  | 0.077  | 0.085   |
| L_VAL1    | 2 H2O[c] + CoA[m] + 3 NAD[m] + FAD[m] + AKG[c] + VAL[c] <=> 2 H[c] + 2 CO2[c] + 3 NADH[m] + FADH2[m] + GLU[c] + PROPCoA[m]        | 0.031  | 0.083  | 0.096  | 0.113   |
| L_PropCoA | CO2[c] + H2O[c] + PROPCoA[m] + ATP[m] <=> 2 H[c] + Pi[c] + SUCCoA[m] + ADP[m]                                                     | 0.093  | 0.242  | 0.148  | 0.254   |
| L_PHE1    | H[c] + NADH[m] + O2[c] + PHE[c] <=> H2O[c] + NAD[m] + TYR[c]                                                                      | 0.013  | 0.029  | 0.049  | 0.056   |
| L_TYR1    | H2O[c] + AKG[m] + 2 O2[c] + TYR[c] <=> 2 H[c] + CO2[c] + FUM[m] + GLU[m] + AcAc[m]                                                | 0.132  | 0.149  | 0.116  | 0.136   |
| L_ACAC1   | CoA[m] + SUCCoA[m] + AcAc[m] <=> 2 AcCoA[m] + SUC[m]                                                                              | 0.132  | 0.177  | 0.130  | 0.194   |
| L_HIS1    | 2 H[c] + 2 H2O[c] + THF[c] + HIS[c] <=> 2 NH4[c] + GLU[m] + MYLTHF[c]                                                             | 0.004  | 0.012  | 0.011  | 0.019   |
| L_LEU1    | CoA[m] + NAD[m] + AKG[m] + LEU[c] <=> CO2[c] + NADH[m] + GLU[m] + IVACoA[m]                                                       | 0.049  | 0.077  | 0.116  | 0.149   |
| L_LEU2    | CO2[c] + 2 H2O[c] + FAD[m] + ATP[m] + IVACoA[m] <=> 2 H[c] + Pi[c] + AcCoA[m] + FADH2[m] + ADP[m] + AcAc[m]                       | 0.000  | 0.029  | 0.013  | 0.058   |
| Eiva      | H2O[c] + IVACoA[m] <=> H[c] + CoA[m] + IVA[m]                                                                                     | 0.049  | 0.057  | 0.091  | 0.103   |
| T_IVA     | IVA[m] <=> IVA[c]                                                                                                                 | 0.049  | 0.057  | 0.091  | 0.103   |
| 6_3_1_2   | ATP[c] + GLU[c] + NH4[c] <=> ADP[c] + H[c] + Pi[c] + GLN[c]                                                                       | 0.191  | 71.169 | 0.345  | 122.427 |
| L_PRO_S   | ATP[c] + 2 H[c] + 2 NADH[c] + GLU[c] <=> ADP[c] + H2O[c] + Pi[c] + 2 NAD[c] + PRO[c]                                              | 0.332  | 71.258 | 0.202  | 122.320 |
| 1_14_11_2 | AKG[c] + PRO[c] + O2[c] <=> CO2[c] + SUC[m] + HYP[c]                                                                              | 0.135  | 0.135  | 0.102  | 0.102   |
| L_SER_S   | H2O[c] + 3PG[c] + NAD[c] + GLU[c] <=> H[c] + Pi[c] + NADH[c] + AKG[c] + SER[c]                                                    | -0.124 | 70.833 | -0.257 | 121.838 |
| 6_3_5_4   | ATP[c] + H2O[c] + ASP[c] + GLN[c] <=> H[c] + GLU[c] + ASN[c] + PPI[c] + AMP[c]                                                    | 0.000  | 23.634 | 0.000  | 40.694  |
| 3_5_3_1a  | H2O[c] + ARG[c] <=> ORN[c] + Urea[c]                                                                                              | 0.000  | 0.000  | 0.000  | 0.000   |

|           |                                                                                     |            |           |            |           |
|-----------|-------------------------------------------------------------------------------------|------------|-----------|------------|-----------|
| T_ORn     | ORN[c] <=> ORN[m]                                                                   | 0.000      | 0.000     | 0.000      | 0.000     |
| 6_3_4_16  | CO2[c] + H2O[c] + NH4[c] + 2 ATP[m] <=> 3 H[c] + Pi[c] + 2 ADP[m] + CaP[m]          | 0.045      | 0.059     | 0.018      | 0.026     |
| 2_1_3_3   | ORN[m] + CaP[m] <=> H[c] + Pi[c] + Citr[m]                                          | 0.045      | 0.059     | 0.018      | 0.026     |
| T_CITR    | Citr[m] <=> Citr[c]                                                                 | 0.045      | 0.059     | 0.018      | 0.026     |
| 6_3_4_5   | ATP[c] + ASP[c] + Citr[c] <=> PPI[c] + AMP[c] + ArgSuc[c]                           | 0.045      | 0.059     | 0.018      | 0.026     |
| 4_3_2_1   | ArgSuc[c] <=> H[c] + ARG[c] + FUM[c]                                                | 0.045      | 0.059     | 0.018      | 0.026     |
| 4_2_1_2a  | H2O[c] + FUM[c] <=> MAL[c]                                                          | 0.118      | 0.136     | 0.074      | 0.084     |
| 2_6_1_13  | AKG[m] + ORN[m] <=> GLU[m] + G5S[m]                                                 | -0.059     | -0.045    | -0.026     | -0.018    |
| 3_5_4_9b  | ATP[c] + THF[c] + FORM[c] <=> ADP[c] + Pi[c] + N10FTHF[c]                           | -0.191     | -0.156    | -0.108     | -0.081    |
| 3_5_4_9a  | H2O[c] + MYLTHF[c] <=> H[c] + N10FTHF[c]                                            | 0.299      | 9.107     | 0.166      | 14.549    |
| 1_5_1_15  | NADH[c] + MYLTHF[c] <=> NAD[c] + METHF[c]                                           | -9.103     | -0.287    | -14.531    | -0.147    |
| 1_5_1_20  | H[c] + NADPH[c] + METHF[c] <=> NADP[c] + MTHF[c]                                    | -0.014     | -0.004    | -0.015     | -0.010    |
| 1_5_1_6   | H2O[c] + NAD[c] + N10FTHF[c] <=> H[c] + CO2[c] + NADH[c] + THF[c]                   | 0.000      | 8.808     | 0.000      | 14.384    |
| T_MAL     | MAL[c] <=> MAL[m]                                                                   | -9996.946  | 29.732    | -9996.946  | 41.935    |
| T_GLU     | GLU[c] <=> GLU[m]                                                                   | -71.422    | -0.458    | -121.636   | 0.530     |
| 1_1_1_37a | NAD[c] + MAL[c] <=> H[c] + NADH[c] + OXA[c]                                         | -10000.000 | 136.868   | -10000.000 | 236.841   |
| SLC25A11  | AKG[m] + MAL[c] <=> MAL[m] + AKG[c]                                                 | -139.227   | 9999.740  | -238.765   | 10000.000 |
| 2_6_1_1b  | OXA[m] + GLU[m] <=> AKG[m] + ASP[m]                                                 | -139.393   | 9999.540  | -239.538   | 9999.642  |
| SLC1A3    | GLU[c] + ASP[m] <=> ASP[c] + GLU[m]                                                 | -139.393   | 9999.540  | -239.538   | 9999.642  |
| 2_6_1_1a  | OXA[c] + GLU[c] <=> AKG[c] + ASP[c]                                                 | -10000.000 | 138.897   | -10000.000 | 239.174   |
| 1_6_1_2   | NADPH[c] + NAD[c] <=> NADP[c] + NADH[c]                                             | 0.000      | 10000.000 | 0.000      | 10000.000 |
| 1_6_1_2b  | NAD[m] + NADPH[m] <=> NADH[m] + NADP[m]                                             | 0.000      | 70.901    | 0.000      | 122.082   |
| L_NADH1   | 4 H[c] + 3 Pi[c] + NADH[m] + 0.5 O2[c] + 3 ADP[m] <=> 4 H2O[c] + NAD[m] + 3 ATP[m]  | 19.424     | 27.711    | 32.059     | 43.987    |
| L_FAD1    | 2 H[c] + 2 Pi[c] + FADH2[m] + 0.5 O2[c] + 2 ADP[m] <=> 3 H2O[c] + FAD[m] + 2 ATP[m] | 0.934      | 5.540     | 0.630      | 8.005     |
| T_ADPATP  | ADP[c] + ATP[m] <=> ATP[c] + ADP[m]                                                 | 67.089     | 85.016    | 109.357    | 133.235   |

|          |                                                                                                                                                                                                              |        |           |        |           |
|----------|--------------------------------------------------------------------------------------------------------------------------------------------------------------------------------------------------------------|--------|-----------|--------|-----------|
| 2_7_4_6  | ATP[c] + GDP[c] <=> ADP[c] + GTP[c]                                                                                                                                                                          | -4.393 | 10000.000 | -7.196 | 10000.000 |
| 2_7_4_3  | ATP[c] + AMP[c] <=> 2 ADP[c]                                                                                                                                                                                 | 0.221  | 23.879    | 0.130  | 40.835    |
| 2_7_1_20 | ATP[c] + Ad[c] <=> ADP[c] + H[c] + AMP[c]                                                                                                                                                                    | 0.004  | 0.014     | 0.010  | 0.015     |
| 3_6_1_3  | ATP[c] + H2O[c] <=> ADP[c] + H[c] + Pi[c]                                                                                                                                                                    | 0.000  | 70.901    | 0.000  | 122.082   |
| 3_6_1_1  | H2O[c] + PPI[c] <=> H[c] + 2 Pi[c]                                                                                                                                                                           | 0.149  | 23.807    | 0.088  | 40.793    |
| L_ATP1   | 6 ATP[c] + CO2[c] + H2O[c] + R5P[c] + GTP[c] + 2 ASP[c] + 2 GLN[c] + GLY[c] + 2 N10FTHF[c] <=> 6 ADP[c] + 10 H[c] + 5 Pi[c] + GDP[c] + 2 GLU[c] + 2 THF[c] + PPI[c] + AMP[c] + 2 FUM[c]                      | 0.043  | 0.043     | 0.025  | 0.025     |
| L_GTP    | 8 ATP[c] + CO2[c] + 2 H2O[c] + R5P[c] + NAD[c] + NH4[c] + ASP[c] + 2 GLN[c] + GLY[c] + 2 N10FTHF[c] <=> 6 ADP[c] + 11 H[c] + 4 Pi[c] + NADH[c] + GTP[c] + 2 GLU[c] + 2 THF[c] + 2 PPI[c] + 2 AMP[c] + FUM[c] | 0.029  | 0.029     | 0.017  | 0.017     |
| L_UTP2   | 3 ATP[c] + R5P[c] + ASP[c] + GLN[c] + 0.5 O2[c] <=> 2 ADP[c] + 2 H[c] + H2O[c] + 2 Pi[c] + GLU[c] + AMP[c] + UTP[c]                                                                                          | 0.072  | 0.072     | 0.042  | 0.042     |
| 6_3_4_2  | ATP[c] + NH4[c] + UTP[c] <=> ADP[c] + 2 H[c] + Pi[c] + CTP[c]                                                                                                                                                | 0.029  | 0.029     | 0.017  | 0.017     |
| L_RNA1   | 0.3 ATP[c] + H2O[c] + 0.2 GTP[c] + 0.3 UTP[c] + 0.2 CTP[c] <=> H[c] + 2 Pi[c] + RNA[c]                                                                                                                       | 0.112  | 0.112     | 0.084  | 0.085     |
| L_DNA2   | 0.3 ATP[c] + 0.3 H[c] + NADPH[c] + 0.3 NADH[c] + 0.2 GTP[c] + 0.3 METHF[c] + 0.3 UTP[c] + 0.2 CTP[c] <=> NADP[c] + 2 Pi[c] + 0.3 NAD[c] + 0.3 THF[c] + DNA[c]                                                | 0.031  | 0.031     | 0.000  | 0.000     |
| L_TC1    | ATP[c] + G6P[c] + H2O[c] <=> ADP[c] + H[c] + 2 Pi[c] + TC[c]                                                                                                                                                 | 0.139  | 0.139     | 0.128  | 0.128     |
| T_CIT    | CIT[m] <=> CIT[c]                                                                                                                                                                                            | 2.035  | 2.046     | 2.356  | 2.363     |
| 4_1_3_8  | ATP[c] + CIT[c] + CoA[c] <=> ADP[c] + Pi[c] + OXA[c] + AcCoA[c]                                                                                                                                              | 2.029  | 2.029     | 2.332  | 2.332     |
| L_C14_0  | 6 ATP[c] + 5 H[c] + H2O[c] + 12 NADPH[c] + 7 AcCoA[c] <=> 6 ADP[c] + 12 NADP[c] + 6 Pi[c] + 7 CoA[c] + FA14_0[c]                                                                                             | 0.003  | 0.003     | 0.004  | 0.004     |
| L_C16_0  | 7 ATP[c] + 6 H[c] + H2O[c] + 14 NADPH[c] + 8 AcCoA[c] <=> 7 ADP[c] + 14 NADP[c] + 7 Pi[c] + 8 CoA[c] + FA16_0[c]                                                                                             | 0.146  | 0.146     | 0.169  | 0.169     |
| L_C16_1  | H[c] + NADH[c] + O2[c] + FA16_0[c] <=> 2 H2O[c] + NAD[c] + FA16_1[c]                                                                                                                                         | 0.024  | 0.024     | 0.028  | 0.028     |
| L_C18_0  | ATP[c] + H[c] + 2 NADPH[c] + AcCoA[c] + FA16_0[c] <=> ADP[c] + 2 NADP[c] + Pi[c] + CoA[c] + FA18_0[c]                                                                                                        | 0.092  | 0.092     | 0.107  | 0.107     |
| L_C18_1  | H[c] + NADH[c] + O2[c] + FA18_0[c] <=> 2 H2O[c] + NAD[c] + OLE[c]                                                                                                                                            | 0.081  | 0.081     | 0.094  | 0.094     |



|            |                                                                                                                                                                                                                                                                                                                                                                                                                                                                                                            |         |         |         |         |
|------------|------------------------------------------------------------------------------------------------------------------------------------------------------------------------------------------------------------------------------------------------------------------------------------------------------------------------------------------------------------------------------------------------------------------------------------------------------------------------------------------------------------|---------|---------|---------|---------|
| L_C20_0    | ATP[c] + H[c] + 2 NADPH[c] + AcCoA[c] + FA18_0[c] <=> ADP[c] + 2 NADP[c] + Pi[c] + CoA[c] + FA20_0[c]                                                                                                                                                                                                                                                                                                                                                                                                      | 0.002   | 0.002   | 0.003   | 0.003   |
| L_C20_1    | H[c] + NADH[c] + O2[c] + FA20_0[c] <=> 2 H2O[c] + NAD[c] + FA20_1[c]                                                                                                                                                                                                                                                                                                                                                                                                                                       | 0.002   | 0.002   | 0.002   | 0.002   |
| L_PHOA1    | 3 H[c] + GAP[c] + NADH[c] + 0.044 FA14_0[c] + 0.402 FA16_0[c] + 0.32 FA16_1[c] + 0.115 FA18_0[c] + 1.086 OLE[c] + 0.005 FA20_0[c] + 0.028 FA20_1[c] <=> 2 H2O[c] + NAD[c] + PHOA[c]                                                                                                                                                                                                                                                                                                                        | 0.075   | 0.075   | 0.086   | 0.086   |
| L_CHOL1    | 18 ATP[c] + 7 H[c] + 30 NADPH[c] + 11 O2[c] + 18 AcCoA[c] <=> 18 ADP[c] + 8 CO2[c] + 3 H2O[c] + 30 NADP[c] + 18 Pi[c] + FORM[c] + 18 CoA[c] + CHOL[c]                                                                                                                                                                                                                                                                                                                                                      | 0.041   | 0.041   | 0.047   | 0.047   |
| L_PROT2    | 4.3 ATP[c] + 3.3 H2O[c] + 0.08 ALA[c] + 0.06 GLU[c] + 0.04 ASN[c] + 0.048 ASP[c] + 0.058 GLN[c] + 0.053 PRO[c] + 0.015 CYS[c] + 0.091 GLY[c] + 0.059 SER[c] + 0.052 THR[c] + 0.069 LYS[c] + 0.008 TRYP[c] + 0.018 MET[c] + 0.043 ILE[c] + 0.061 VAL[c] + 0.034 PHE[c] + 0.025 TYR[c] + 0.02 HIS[c] + 0.081 LEU[c] + 0.035 HYP[c] + 0.049 ARG[c] <=> 4.3 ADP[c] + 4.3 H[c] + 4.3 Pi[c] + Protein[c]                                                                                                         | 3.846   | 3.846   | 2.905   | 2.906   |
| L_BIOMASS1 | 0.153 RNA[c] + 0.042 DNA[c] + 0.19 TC[c] + 0.102 PHOA[c] + 0.056 CHOL[c] + 5.241 Protein[c] <=> BIOMASS[e]                                                                                                                                                                                                                                                                                                                                                                                                 | 0.734   | 0.734   | 0.000   | 0.000   |
| L_BIO_size | 0.13 RNA[c] + 0.197 TC[c] + 0.133 PHOA[c] + 0.072 CHOL[c] + 4.47 Protein[c] <=> BIOMASS[e]                                                                                                                                                                                                                                                                                                                                                                                                                 | 0.000   | 0.000   | 0.650   | 0.650   |
| L_MoAB1    | 4.3 ATP[c] + 0.012 G6P[c] + 3.3 H2O[c] + 0.0015 NADPH[c] + 0.0015 PEP[c] + 0.067 ALA[c] + 0.0442 GLU[c] + 0.0351 ASN[c] + 0.0413 ASP[c] + 0.0643 GLN[c] + 0.0671 PRO[c] + 0.0248 CYS[c] + 0.07 GLY[c] + 0.0548 SER[c] + 0.0816 THR[c] + 0.0723 LYS[c] + 0.0155 TRYP[c] + 0.0145 MET[c] + 0.0465 ILE[c] + 0.089 VAL[c] + 0.0372 PHE[c] + 0.0424 TYR[c] + 0.0155 HIS[c] + 0.071 LEU[c] + 0.0455 ARG[c] + 0.0075 AcCoA[c] <=> 4.3 ADP[c] + 4.3 H[c] + 0.0015 NADP[c] + 4.3135 Pi[c] + 0.0075 CoA[c] + PROD[c] | 0.064   | 0.064   | 0.136   | 0.145   |
| MT_H2O     | H2O[c] <=> H2O[e]                                                                                                                                                                                                                                                                                                                                                                                                                                                                                          | 18.181  | 20.256  | 24.848  | 27.104  |
| MT_Pi      | Pi[c] <=> Pi[e]                                                                                                                                                                                                                                                                                                                                                                                                                                                                                            | -0.218  | -0.218  | -0.171  | -0.171  |
| MT_SO4     | SO4[c] <=> SO4[e]                                                                                                                                                                                                                                                                                                                                                                                                                                                                                          | 0.188   | 0.217   | 0.102   | 0.120   |
| MT_H       | H[c] <=> H[e]                                                                                                                                                                                                                                                                                                                                                                                                                                                                                              | 2.583   | 2.961   | -1.217  | -0.327  |
| MT_O2      | O2[c] <=> O2[e]                                                                                                                                                                                                                                                                                                                                                                                                                                                                                            | -16.114 | -13.553 | -23.815 | -20.720 |
| MT_CO2     | CO2[c] <=> CO2[e]                                                                                                                                                                                                                                                                                                                                                                                                                                                                                          | 15.083  | 17.412  | 22.335  | 25.433  |
| MT_Glc     | Glc[c] <=> GLc[e]                                                                                                                                                                                                                                                                                                                                                                                                                                                                                          | -4.623  | -4.489  | -4.134  | -4.069  |
| MT_Lac     | LAC[c] <=> LAC[e]                                                                                                                                                                                                                                                                                                                                                                                                                                                                                          | 3.068   | 3.103   | -0.308  | -0.201  |

|         |                     |        |        |        |        |
|---------|---------------------|--------|--------|--------|--------|
| MT_PYR  | PYR[c] <=> PYR[e]   | -0.020 | 0.003  | -0.041 | 0.002  |
| MT_ACE  | ACE[c] <=> ACE[e]   | 0.044  | 0.051  | 0.179  | 0.216  |
| MT_FORM | FORM[c] <=> FORM[e] | 0.272  | 0.298  | 0.161  | 0.183  |
| MT_FUM  | FUM[c] <=> FUM[e]   | 0.037  | 0.041  | 0.010  | 0.012  |
| MT_SUC  | SUC[c] <=> SUC[e]   | -0.511 | -0.490 | -0.184 | -0.166 |
| MT_CIT  | CIT[c] <=> CIT[e]   | 0.006  | 0.016  | 0.024  | 0.031  |
| MT_OBU  | OBU[c] <=> OBU[e]   | 0.014  | 0.023  | 0.029  | 0.036  |
| MT_IVA  | IVA[c] <=> IVA[e]   | 0.049  | 0.057  | 0.091  | 0.103  |
| MT_NH4  | NH4[c] <=> NH4[e]   | 0.380  | 0.440  | 0.545  | 1.000  |
| MT_LYS  | LYS[c] <=> LYS[e]   | -0.270 | -0.270 | -0.224 | -0.212 |
| MT_TRP  | TRYP[c] <=> TRYP[e] | -0.107 | -0.098 | -0.059 | -0.053 |
| MT_ILE  | ILE[c] <=> ILE[e]   | -0.263 | -0.249 | -0.216 | -0.208 |
| MT_VAL  | VAL[c] <=> VAL[e]   | -0.323 | -0.271 | -0.302 | -0.287 |
| MT_LEU  | LEU[c] <=> LEU[e]   | -0.393 | -0.365 | -0.394 | -0.362 |
| MT_PHE  | PHE[c] <=> PHE[e]   | -0.162 | -0.146 | -0.159 | -0.154 |
| MT_TYR  | TYR[c] <=> TYR[e]   | -0.218 | -0.218 | -0.159 | -0.146 |
| MT_HIS  | HIS[c] <=> HIS[e]   | -0.090 | -0.082 | -0.079 | -0.072 |
| MT_THR  | THR[c] <=> THR[e]   | -0.269 | -0.251 | -0.233 | -0.208 |
| MT_SER  | SER[c] <=> SER[e]   | -0.734 | -0.709 | -0.650 | -0.588 |
| MT_GLY  | GLY[c] <=> GLY[e]   | 0.096  | 0.141  | 0.025  | 0.046  |
| MT_Gln  | GLN[c] <=> GLN[e]   | -0.251 | -0.174 | 0.041  | 0.054  |
| MT_GLU  | GLU[c] <=> GLU[e]   | -0.091 | -0.069 | -0.411 | -0.288 |
| MT_ALA  | ALA[c] <=> ALA[e]   | 0.459  | 0.574  | -0.073 | -0.032 |
| MT_PRO  | PRO[c] <=> PRO[e]   | -0.244 | -0.186 | -0.185 | -0.170 |
| MT_ASN  | ASN[c] <=> ASN[e]   | -1.005 | -0.941 | -0.558 | -0.516 |

|         |                     |         |         |         |         |
|---------|---------------------|---------|---------|---------|---------|
| MT_ASP  | ASP[c] <=> ASP[e]   | -0.143  | -0.107  | -0.250  | -0.245  |
| MT_Cys  | CYS[c] <=> CYS[e]   | -0.262  | -0.243  | -0.152  | -0.139  |
| MT_MET  | MET[c] <=> MET[e]   | -0.084  | -0.074  | -0.069  | -0.065  |
| MT_ARG  | ARG[c] <=> ARG[e]   | -0.146  | -0.132  | -0.131  | -0.123  |
| MT_Urea | Urea[c] <=> Urea[e] | 0.000   | 0.000   | 0.000   | 0.000   |
| MT_Prod | PROD[c] <=> PROD[e] | 0.064   | 0.064   | 0.136   | 0.145   |
| Ex_H2O  | H2O[e] <=>          | 18.181  | 20.256  | 24.848  | 27.104  |
| Ex_Pi   | Pi[e] <=>           | -0.218  | -0.218  | -0.171  | -0.171  |
| Ex_SO4  | SO4[e] <=>          | 0.188   | 0.217   | 0.102   | 0.120   |
| Ex_H    | H[e] <=>            | 2.583   | 2.961   | -1.217  | -0.327  |
| Ex_O2   | O2[e] <=>           | -16.114 | -13.553 | -23.815 | -20.720 |
| Ex_CO2  | CO2[e] <=>          | 15.083  | 17.412  | 22.335  | 25.433  |
| Ex_Glc  | Glc[e] <=>          | -4.623  | -4.489  | -4.134  | -4.069  |
| Ex_LAC  | LAC[e] <=>          | 3.068   | 3.103   | -0.308  | -0.201  |
| Ex_PYR  | PYR[e] <=>          | -0.020  | 0.003   | -0.041  | 0.002   |
| Ex_ACE  | ACE[e] <=>          | 0.044   | 0.051   | 0.179   | 0.216   |
| Ex_FORM | FORM[e] <=>         | 0.272   | 0.298   | 0.161   | 0.183   |
| Ex_FUM  | FUM[e] <=>          | 0.037   | 0.041   | 0.010   | 0.012   |
| Ex_SUC  | SUC[e] <=>          | -0.511  | -0.490  | -0.184  | -0.166  |
| Ex_CIT  | CIT[e] <=>          | 0.006   | 0.016   | 0.024   | 0.031   |
| Ex_OBU  | OBU[e] <=>          | 0.014   | 0.023   | 0.029   | 0.036   |
| Ex_IVA  | IVA[e] <=>          | 0.049   | 0.057   | 0.091   | 0.103   |
| Ex_NH4  | NH4[e] <=>          | 0.380   | 0.440   | 0.545   | 1.000   |
| Ex_LYS  | LYS[e] <=>          | -0.270  | -0.270  | -0.224  | -0.212  |
| Ex_TRYP | TRYP[e] <=>         | -0.107  | -0.098  | -0.059  | -0.053  |

|            |                |        |        |        |        |
|------------|----------------|--------|--------|--------|--------|
| Ex_ILE     | ILE[e] <=>     | -0.263 | -0.249 | -0.216 | -0.208 |
| Ex_VAL     | VAL[e] <=>     | -0.323 | -0.271 | -0.302 | -0.287 |
| Ex_LEU     | LEU[e] <=>     | -0.393 | -0.365 | -0.394 | -0.362 |
| Ex_PHE     | PHE[e] <=>     | -0.162 | -0.146 | -0.159 | -0.154 |
| Ex_TYR     | TYR[e] <=>     | -0.218 | -0.218 | -0.159 | -0.146 |
| Ex_HIS     | HIS[e] <=>     | -0.090 | -0.082 | -0.079 | -0.072 |
| Ex_THR     | THR[e] <=>     | -0.269 | -0.251 | -0.233 | -0.208 |
| Ex_SER     | SER[e] <=>     | -0.734 | -0.709 | -0.650 | -0.588 |
| Ex_GLY     | GLY[e] <=>     | 0.096  | 0.141  | 0.025  | 0.046  |
| Ex_GLN     | GLN[e] <=>     | -0.251 | -0.174 | 0.041  | 0.054  |
| Ex_GLU     | GLU[e] <=>     | -0.091 | -0.069 | -0.411 | -0.288 |
| Ex_ALA     | ALA[e] <=>     | 0.459  | 0.574  | -0.073 | -0.032 |
| Ex_PRO     | PRO[e] <=>     | -0.244 | -0.186 | -0.185 | -0.170 |
| Ex_ASN     | ASN[e] <=>     | -1.005 | -0.941 | -0.558 | -0.516 |
| Ex_ASP     | ASP[e] <=>     | -0.143 | -0.107 | -0.250 | -0.245 |
| Ex_CYS     | CYS[e] <=>     | -0.262 | -0.243 | -0.152 | -0.139 |
| Ex_MET     | MET[e] <=>     | -0.084 | -0.074 | -0.069 | -0.065 |
| Ex_ARG     | ARG[e] <=>     | -0.146 | -0.132 | -0.131 | -0.123 |
| Ex_Urea    | Urea[e] <=>    | 0.000  | 0.000  | 0.000  | 0.000  |
| Ex_BIOMASS | BIOMASS[e] <=> | 0.734  | 0.734  | 0.650  | 0.650  |
| Ex_PROD    | PROD[e] <=>    | 0.064  | 0.064  | 0.136  | 0.145  |



# ESM\_3 Supplementary figures

**Fig. S1** Specific production (positive values) and consumption rates (negative values) ( $\text{mmol} \times 10^9 \text{ cells} \times \text{day}^{-1}$ ) of organic acids during the NI and the SI phase. Error bars show standard deviation of triplicate fed-batch cultures

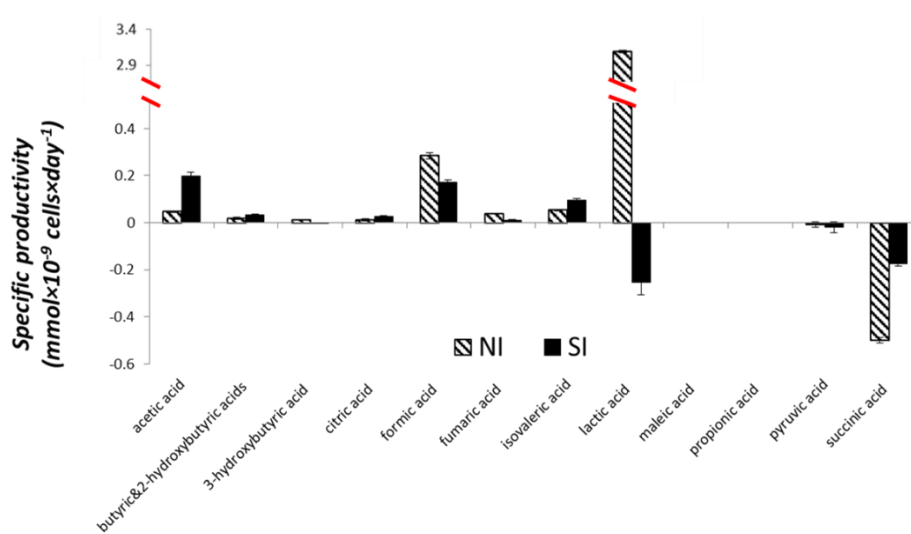

**Table S1** Cellular protein composition (g/kg of dry weight)

| <b>Protein hydrolysate</b>        | <b>Composition (g/kg)</b> |       |
|-----------------------------------|---------------------------|-------|
| <b>Aspartic acid + Asparagine</b> | <b>64.89</b>              | ±0.59 |
| <b>Threonine</b>                  | <b>34.78</b>              | ±0.49 |
| <b>Serine</b>                     | <b>34.83</b>              | ±0.11 |
| <b>Glutamic acid + Glutamine</b>  | <b>96.39</b>              | ±0.52 |
| <b>Proline</b>                    | <b>34.12</b>              | ±0.40 |
| <b>Glycine</b>                    | <b>38.35</b>              | ±0.55 |
| <b>Alanine</b>                    | <b>40.15</b>              | ±0.28 |
| <b>Valine</b>                     | <b>40.03</b>              | ±0.44 |
| <b>Isoleucine</b>                 | <b>31.78</b>              | ±0.57 |
| <b>Leucine</b>                    | <b>59.53</b>              | ±0.58 |
| <b>Tyrosine</b>                   | <b>25.55</b>              | ±0.04 |
| <b>Phenylalanine</b>              | <b>31.75</b>              | ±0.01 |
| <b>Lysine</b>                     | <b>57.14</b>              | ±2.18 |
| <b>Histidine</b>                  | <b>17.05</b>              | ±0.25 |
| <b>Arginine</b>                   | <b>47.93</b>              | ±1.95 |
| <b>Cysteine</b>                   | <b>10.35</b>              | ±0.92 |
| <b>Methionine</b>                 | <b>14.97</b>              | ±0.17 |
| <b>Tryptophan</b>                 | <b>9.64</b>               | ±0.25 |
| <b>Sum</b>                        | <b>689.19</b>             |       |

All amino acids were measured by Ansynth Service B.V. on HPLC-UV/FLU after protein hydrolysis

± Deviation from the average value of the duplicate data points on day 4 and day 7

**Table S2** Cellular fatty acids composition (w/w %)

| <b>Fatty acids</b> | <b>Percentage (w/w)</b> |       |
|--------------------|-------------------------|-------|
| <b>C8:0</b>        | -                       | -     |
| <b>C10:0</b>       | -                       | -     |
| <b>C12:0</b>       | <b>0.1%</b>             | ±0.1% |
| <b>C14:0</b>       | <b>1.9%</b>             | ±0.4% |
| <b>C15:0</b>       | -                       | -     |
| <b>C16:0</b>       | <b>18.9%</b>            | ±0.8% |
| <b>C16:1</b>       | <b>14.9%</b>            | ±0.8% |
| <b>C16:2</b>       | -                       | -     |
| <b>C16:3</b>       | <b>0.1%</b>             | ±0.0% |
| <b>C16:4</b>       | -                       | -     |
| <b>C18:0</b>       | <b>6.0%</b>             | ±0.6% |
| <b>C18:1</b>       | <b>56.2%</b>            | ±1.6% |
| <b>C18:2</b>       | -                       | -     |
| <b>C18:3</b>       | -                       | -     |
| <b>C18:4</b>       | -                       | -     |
| <b>C19:0</b>       | -                       | -     |
| <b>C20:0</b>       | <b>0.3%</b>             | ±0.0% |
| <b>C20:1</b>       | <b>1.6%</b>             | ±0.1% |
| <b>C20:2-n6</b>    | -                       | -     |
| <b>C20:3-n3</b>    | -                       | -     |
| <b>C20:4-n6</b>    | -                       | -     |
| <b>C20:5-n3</b>    | -                       | -     |
| <b>C22:0</b>       | -                       | -     |
| <b>C22:1</b>       | -                       | -     |
| <b>C24:0</b>       | -                       | -     |

± Standard deviation of six measurements of cells generated from three different culture days (day 4, 7, and 10) with two replicates per culture day
